# Supplementary material for: Correlation between Levels of Vitamins D3 and E in Type 2 Diabetes Mellitus: A Case-Control Study in Serdang, Selangor, Malaysia
Source: MDPI journal article supplement (doi:10.3390/nu13072288), 2021-07-01
Supplement: s1 [file s1]

## BORANG SOAL SELIDIK/ *QUESTIONNAIRE FORM*

*This questionnaire will be conducted as an interview.*

1. Nama / *Name*:
2. No kad pengenalan (baru) / *New IC number*:
3. Tarikh lahir / *Date of birth*:
4. Umur / *Age*:
5. Alamat rumah / *Home address*:
6. Alamat kerja / *Workplace address*:
7. No telefon / *Phone number*:
8. Bangsa / *Ethnicity*:
9. Agama / *Religion* :
10. Taraf pendidikan paling tinggi / *Highest education level*:
  - a. Tidak bersekolah / *Never schooled*
  - b. Sekolah rendah / *Primary school*
  - c. Institusi pengajian tingi / *Secondary school*
  - d. Lain-lain , nyatakan / *Others , specify* : \_\_\_\_\_
  - e. Jumlah tahun pendidikan / *Total years of education* : \_\_\_\_\_
11. Status perkahwinan / *Marital status*:
  - a. Bujang / *Single*
  - b. Berkahwin / *Married*
  - c. Bercerai / *Divorced* (Sudah berapa lama menjadi duda? / *For how long have you been a divorcee?* Tahun/*Year* \_\_\_\_\_)
12. Adakah anda tinggal..... / *Are you living.....?*
  - a. Sendirian / *Alone*
  - b. Dengan isteri / *With wife*
  - c. Dengan isteri dan / *With wife & children*
  - d. Dengan / *With children*
  - e. Lain-lain , nyatakan / *Others , specify* \_\_\_\_\_

13. Apakah status pekerjaan anda sekarang? / *What is your current job status?* \_\_\_\_\_

14. Berapakah anggaran atau purata pendapatan jumlah pendapatan isi rumah? / *How much is the average monthly income for the whole family?* RM \_\_\_\_\_

15. Adakah ibubapa, adik beradik atau saudara mara terdekat anda yang menghidap diabetes? / *Are there any of your parents, siblings or close relative been diagnosed with diabetes?*

---

16. Pernahkah anda menggunakan hasil tembakau/merokok? (Walaupun sekali guna) / *Have you ever used any tobacco products/smoking? (Even once)*

a. Ya / *Yes*

Jika ya nyatakan \_\_\_\_\_ batang per hari / *If yes specify \_\_\_\_\_ sticks per day*

b. Tidak , *No*

c. Bekas perokok ( berapa tahun telah berhenti \_\_\_\_\_ jika kurang daripada satu tahun , nyatakan berapa batang rokok sehari \_\_\_\_\_ )

*Ex- smoker. (How long have you quit smoking \_\_\_\_\_years, if less than one year, how many stick a day \_\_\_\_\_ )*

17. Pernahkah anda mengambil alcohol? (Walaupun sekali guna) / *Have you ever taken alcohol drink? (Even once).*

a. Ya / *Yes*

Jika ya nyatakan \_\_\_\_\_ gelas per hari / perminggu / perbulan / *If yes, specify \_\_\_\_\_ glass per day / per week /per month*

b. Tidak / *No*

c. Bekas peminum alcohol ( berapa tahun telah berhenti \_\_\_\_\_ jika , kurang daripada satu tahun , nyatakan berapa gelas alcohol sehari \_\_\_\_\_ )

*Ex alcohol (How long have you quit alcohol \_\_\_\_\_ years, If less than one year, how many glass a day \_\_\_\_\_ )*

d. EJ / RA

18. Adakah anda menghidapi sebarang penyakit kronik berikut? / *Do you have any chronic diseases other than diabetes?*

a. Sakit jantung / *Heart diseases*

Ya / Yes                      2. Tidak / No                      3. Tidak fohu / Don't Know

b. Apakah Anda menderita setiap jenis masalah pencernaan/*gastrointestinal problem*

Ya / Yes                      2. Tidak / No                      3. Tidak fohu / Don't Know

c. *Hyperlipidemia*

Ya / Yes                      2. Tidak / No                      3. Tidak fohu / Don't Know

d. *Renaldisease*

Ya / Yes                      2. Tidak / No                      3. Tidak fohu / Don't Know

e. *Arthrities / Arthrities*

Ya / Yes                      2. Tidak / No                      3. Tidak fohu / Don't Know

f. *Epilepsi / Epilepsy*

Ya / Yes                      2. Tidak / No                      3. Tidak fohu / Don't Know

g. Lain-lain , sila nyatakan / *Others , specify* : \_\_\_\_\_

19. Berapa lamakah anda menghadapi kencing manis/*How long have you had diabetes?* . . . . .

20. Senaraikan sebarang ubat-ubatan atau makanan tambahan atau herba yang sedang anda ambil /*List any medications or supplements or herbs you are currently taking.*

a. Nama /*Name* . . . . .

b. Dos/*Dose*. . . . .

c. Masa Diambil/*Time Taken*. . . . .

21. Jika anda mengambil insulin: (sila bulatka) Adakah anda menyuntik insulin dengan /*If you take insulin: (please circle) Do you inject insulin with:*

a. picagari /*a syringe*

b. pen insulin /*an insulin pen*

c. pam insulin/*an insulin pump*

22. Pernahkah anda terlupa untuk mengambil ubat kencing manis anda /*Have you ever forgotten to take your diabetes medication?* . . . . .

Jika ya , apa yang anda lakukan? *If yes, what did you do?* . . . . .

23. Adakah anda memantau paras gula dalam darah anda/*Do you monitor your blood sugar?* . . . . .

Jika ya , berapa kali anda memantau setiap hari/*If yes, how many times do you monitor per day?*

- a. Keputusan biasa:*Usual results:*
- b. Puasa /*Fasting* \_\_\_\_\_
- c. Sebelum makan /*Before meals* \_\_\_\_\_
- d. 2 jam selepas makan /*2 hours after meals* \_\_\_\_\_
- e. Tidur/ *Bedtime* \_\_\_\_\_

24. Adakah anda pernah diberikan rancangan pemakanan /*Have you ever been given a meal plan?* . . . .  
.....

25. Berapa kali anda makan setiap hari /*How many times do you eat per day?*

No Kekurangan makan /*No. of meals* \_\_\_\_\_ Bilangan makanan ringan /*No. of snacks*  
\_\_\_\_\_

26. Berapa kali seminggu anda makan di luar rumah /*How many times a week do you eat away from home?* . . . . .

27. Bagaimana perasaan atau tekanan anda mempengaruhi cara pemakanan anda /*How does your mood or stress affect your eating?* . . . . .

28. Penggunaan makanan segera / Makan dengan cepat/ *Use convenience foods Eat rapidly*  
Senaraikan sebarang alahan makanan / intoleran /*List any food allergies / intolerances:* . . . . .  
.....

29. Adakah anda mempunyai apa-apa keperluan diet khas atau amalan agama /*Do you have any special dietary needs or religious observances?*

Jika ya , sila jelaskan /*If yes, please explain:* . . . . .  
.....

30. Adakah terdapat banyak tekanan dalam hidup anda/*Is there much stress in your life?*

Jika ya , terangkan /*If yes, explain:* . . . . .

31. Adakah anda aktif secara fizikal /*Are you physically active?* . . . . .

Jika ya , jenis (s) aktiviti fizikal / *If yes, type(s) of physical activity:* . . . . .

Berapa kerap/*How often?* \_\_\_\_\_

Berapa lama/ *How long?* \_\_\_\_\_

32. Bagaimana anda menggambarkan kesihatan anda/*How would you describe your general health?*

Cemerlang /*Excellent*.....Baik/*Good* ..... Sederhana/*Fair*.....Lemah/ *Poor*.....

33. Bagaimana anda menilai pemahaman anda tentang diabetes/*How would you rate your understanding of diabetes?*

Cemerlang /*Excellent*.....Baik/*Good* ..... Sederhana/*Fair*.....Lemah/ *Poor*.....

34. Bagaimana perasaan anda tentang menghadapi diabetes/*How do you feel about having diabetes?*

.....
